# Supplementary material
Source: PubMed Central journal article supplement (PMC3199004)
Supplement: supp_en.2011-1521v1_EN-11-1521suppfig1.pdf [file supp_en.2011-1521v1_EN-11-1521suppfig1.pdf]

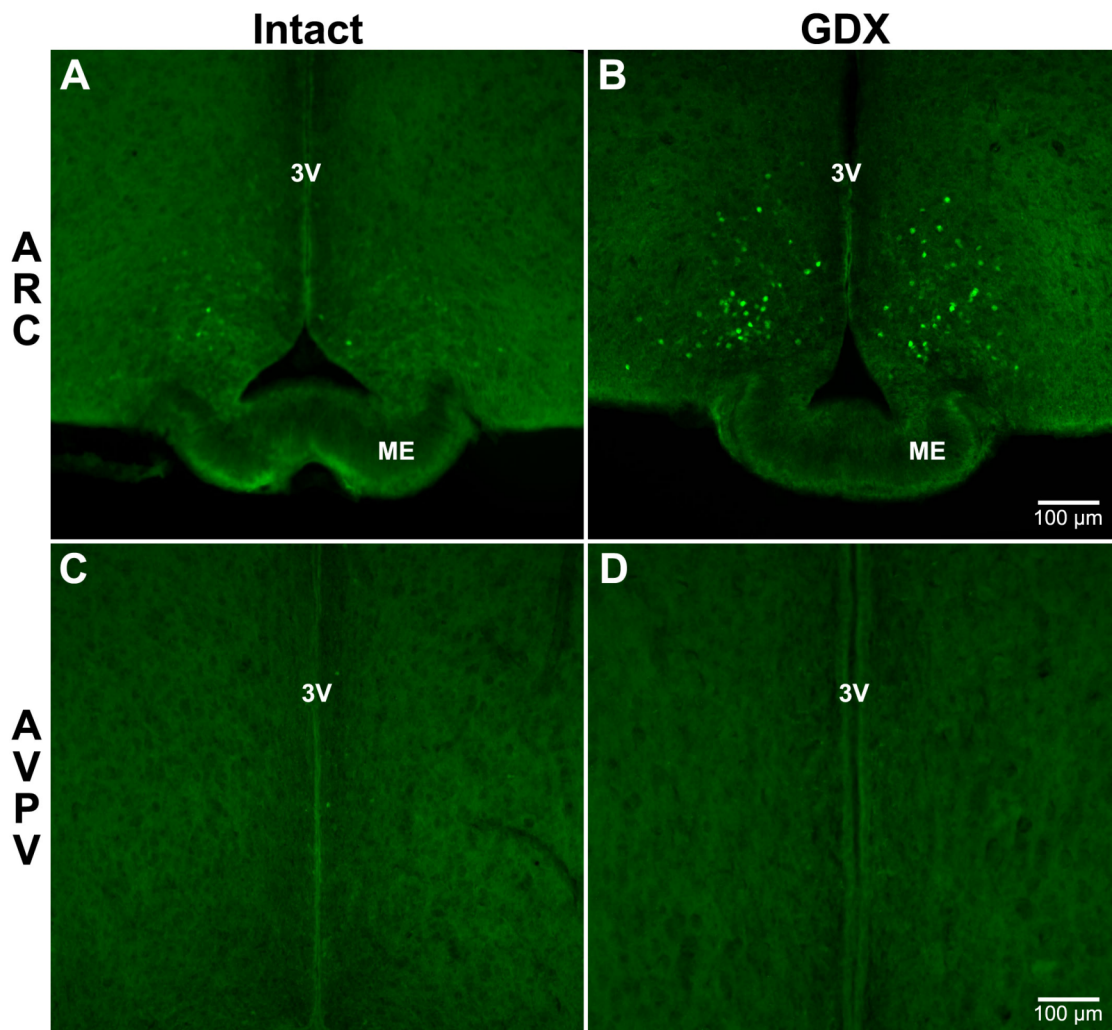

**Supplemental Fig. 1.** Photomicrographs of GFP-expressing cells in the arcuate (ARC) and the anteroventral periventricular nucleus (AVPV) of intact (A and C) and gonalectomized (GDX) male *Kiss1-CreGFP* mice. The distributions of GFP expression in the ARC (A-B) and the AVPV (C-D) are similar to the known distributions of *Kiss1* mRNA in those same regions (1). Furthermore, GDX induces GFP expression in the ARC (B) compared to that observed in intact animals (A). Relatively few GFP-expressing cells can be seen in the AVPV of intact male mice (C), and virtually none appear in GDX animals. ME = Median Eminence. 3V = Third ventricle.

#### Reference

1. Smith JT, HM Dungan, EA Stoll, ML Gottsch, RE Braun, SM Eacker, DK Clifton, RA Steiner 2005 Differential regulation of *KISS-1* mRNA expression by sex steroids in the brain of the male mouse. *Endocrinology* 146:2976-2984
